# Supplementary material for: Structural characterization of 13C-enriched humins and alkali-treated 13C humins by 2D solid-state NMR
Source: Royal Society of Chemistry journal article supplement (doi:10.1039/c5gc00327j), 2015-01-01
Supplement: c5gc00327j1.pdf [file c5gc00327j1.pdf]

## Supporting information

### Structural Characterization of $^{13}\text{C}$ -Enriched Humins and Alkali-treated $^{13}\text{C}$ Humins by 2D Solid-state NMR

Ilona van Zandvoort,<sup>†,a</sup> Eline J. Koers,<sup>†,b</sup> Markus Weingarth<sup>b</sup>, Pieter C. A. Bruijninx<sup>\*,a</sup>, Marc Baldus,<sup>\*,b</sup> and Bert M. Weckhuysen<sup>\*,a</sup>

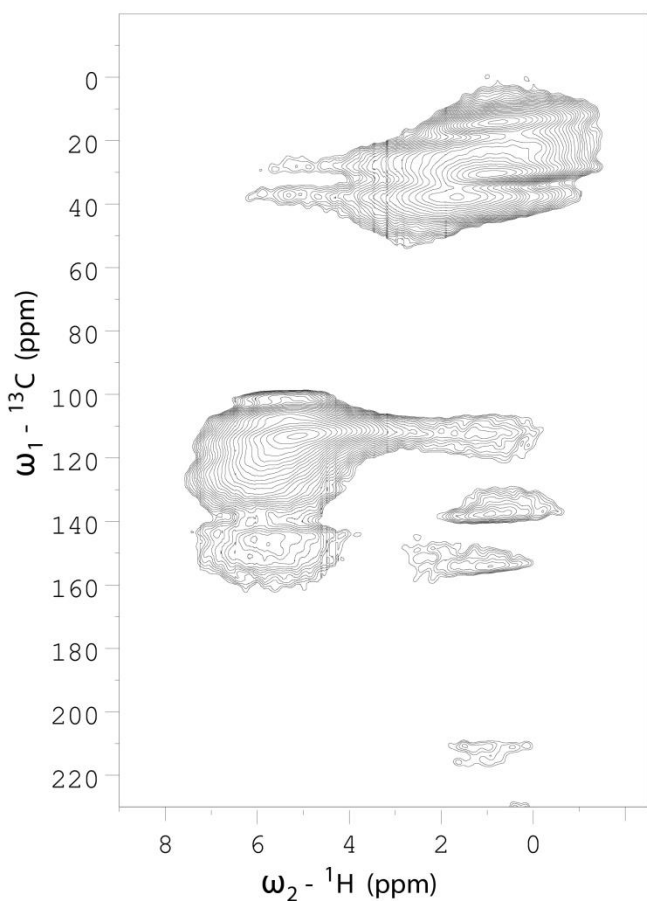

Figure S1. Proton-detected HETCOR spectra of  $^{13}\text{C}$ -labeled humins recorded with CP contact times of 2.5 ms for both CP steps. The lower contour level allows for the long-range correlations  $\text{C}_{\text{ketone}}\text{-H}_{\text{aliphatic}}$  around  $\delta\ ^1\text{H} = 1\text{-}2\text{ ppm}$  and  $\delta\ ^{13}\text{C} = 210\text{ ppm}$  to be observed.
